# Supplementary material for: Maladaptive striatal plasticity and abnormal reward‐learning in cervical dystonia
Source: PubMed Central journal article supplement (PMC6900037; doi:10.1111/ejn.14414), 2019-05-14
Supplement: EJN-50-3191-s001.pdf [file EJN-50-3191-s001.pdf]

## Supporting Information

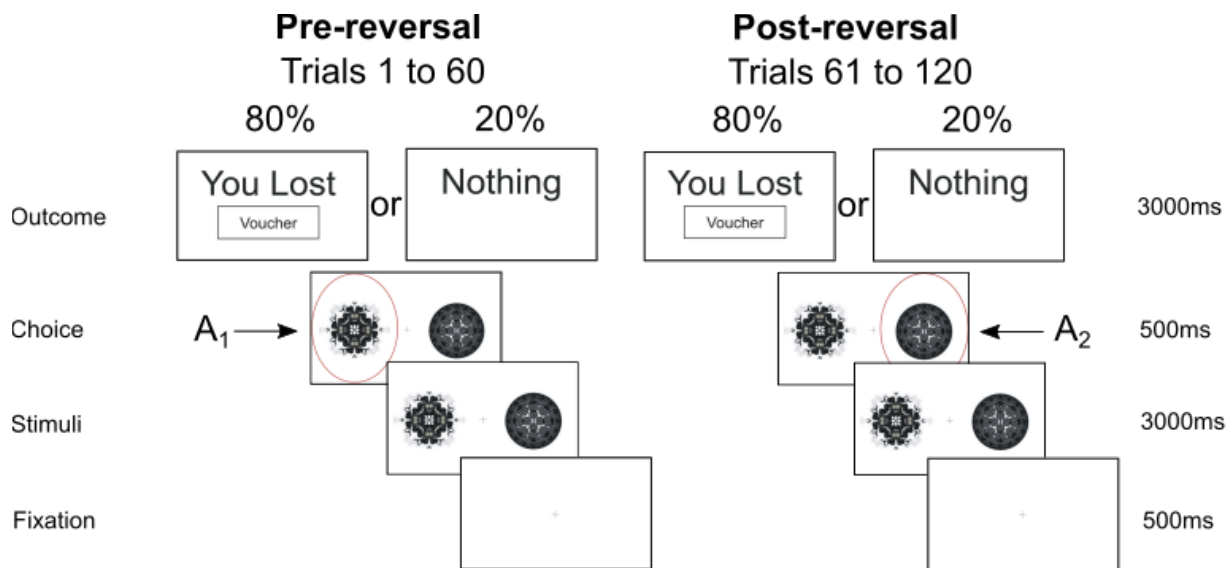

**Supplementary Figure 1:- Probabilistic reversal learning task.** Example of fractal images presented during a single loss trial. The probability of receiving a loss “voucher” reverses after 60 trials requiring the participant to suppress the previously learnt choice and learn to “reverse” their decision to choose the previously low value (pre-reversal) fractal. In the pre-reversal phase choice of A<sub>1</sub> is associated with an 80% outcome of loss. Post- reversal this reduces to 20% with the choice of A<sub>2</sub> being associated with 80%.
